# Supplementary material for: Direct detection of histamine in fish flesh using microchip electrophoresis with capacitively coupled contactless conductivity detection
Source: Royal Society of Chemistry journal article supplement (doi:10.1039/c4ay02866j), 2015-01-01
Supplement: c4ay02866j1.pdf [file c4ay02866j1.pdf]

## Supporting Information

### **Direct detection of histamine in fish flesh using microchip electrophoresis with capacitively coupled contactless conductivity detection**

**Leigh D. Thredgold<sup>a</sup>, Amanda V. Ellis<sup>a</sup>, and Claire E. Lenehan<sup>b</sup>**

<sup>a</sup> **Flinders Centre for Nanoscale Science and Technology, Flinders University, GPO Box 2100, Adelaide 5001, Australia.**

<sup>b</sup> **School of Chemical and Physical Sciences, Flinders University, GPO Box 2100, Adelaide 5001, Australia E-mail: [claire.lenehan@flinders.edu.au](mailto:claire.lenehan@flinders.edu.au)**

### Effect of increasing BGE ionic strength

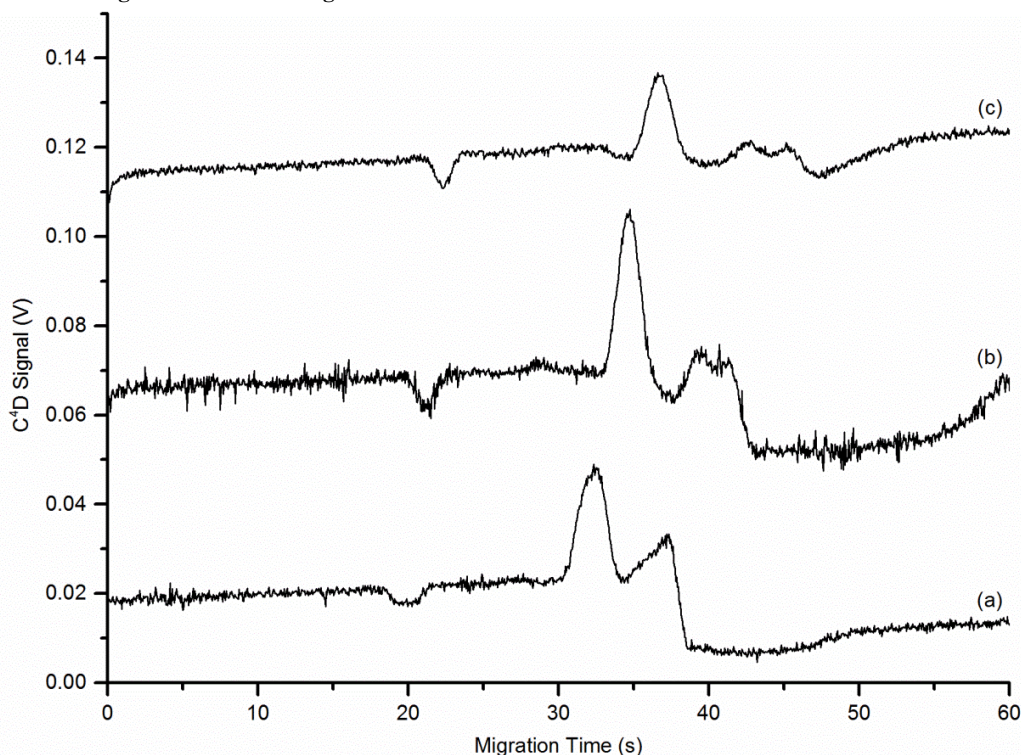

Fig S1: Electropherograms of a standard containing the biogenic amines histamine ( $10 \text{ mg}\cdot\text{L}^{-1}$ ), tyramine ( $10 \text{ mg}\cdot\text{L}^{-1}$ ) and 2-phenylethylamine ( $10 \text{ mg}\cdot\text{L}^{-1}$ ) using (a) 25 mM HEPES/5 mM histidine BGE in 5% v/v isopropanol (pH 6.32), (b) 50 mM HEPES/10 mM histidine BGE in 5% v/v isopropanol (pH 6.31) and (c) 100 mM HEPES/20 mM histidine BGE in 5% v/v isopropanol (pH 6.30). Operating conditions: microchip 57/37 mm total/effective length; injection voltage 1.0 kV for 5 s; separation voltage 1.4 kV. C<sup>4</sup>D detector: sine waveform of 216 kHz 10 V<sub>p-p</sub>.

### Effect of increasing ratio of HEPES:His at the higher BGE concentration

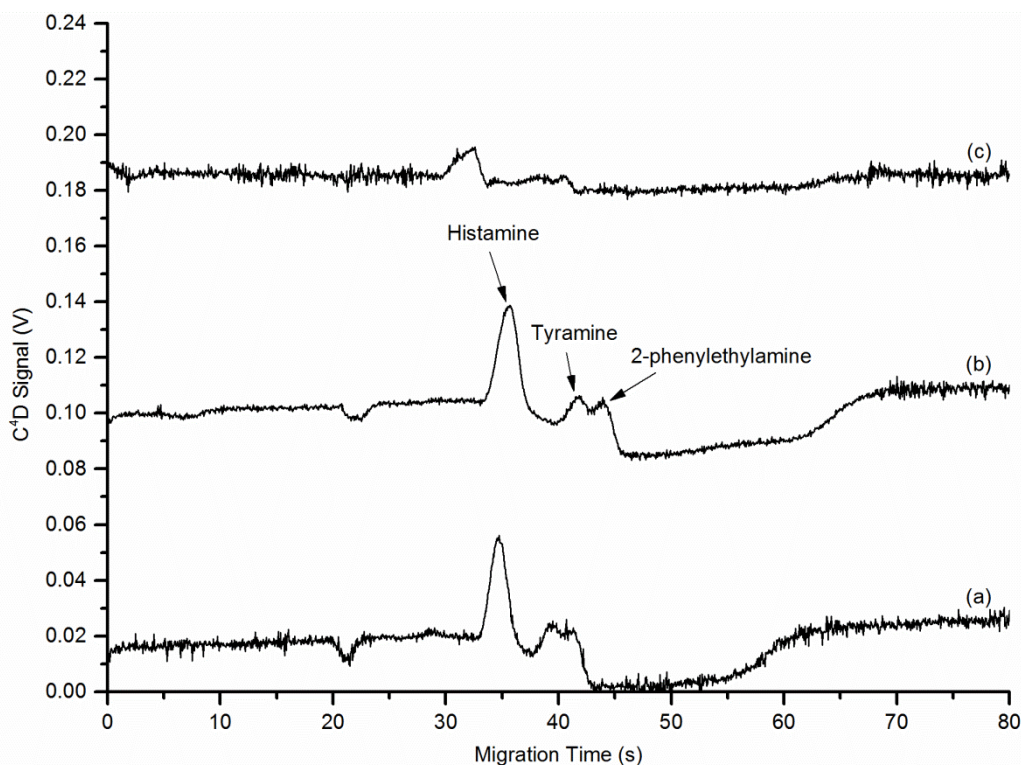

Fig S2: Electropherograms of a standard containing the biogenic amines histamine ( $10 \text{ mg}\cdot\text{L}^{-1}$ ), tyramine ( $10 \text{ mg}\cdot\text{L}^{-1}$ ) and 2-phenylethylamine ( $10 \text{ mg}\cdot\text{L}^{-1}$ ) using (a) 50 mM HEPES/10 mM histidine (5:1) BGE in 5% v/v isopropanol (pH 6.31), (b) 50 mM HEPES/5 mM histidine (10:1) BGE in 5% v/v isopropanol (pH 6.03) and (c) 50 mM HEPES/2.5 mM histidine (20:1) BGE in 5% v/v isopropanol (pH 6.01). Operating conditions: as per Fig. S1

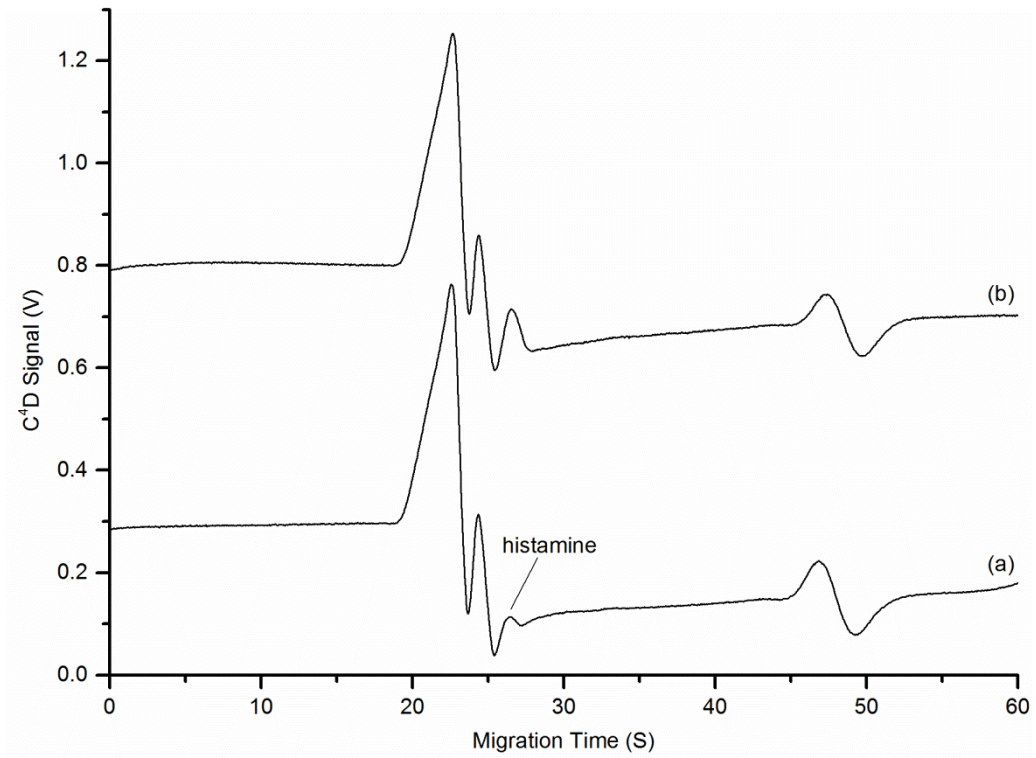

**Fig S3:** Electropherograms of a tuna flesh extract (a) without spike and (b) with a 47.5 µg/g histamine spike using 50 mM HEPES/5 mM histidine BGE in 5% v/v isopropanol (pH 6.03). Operating conditions: as per Fig. S1
